# Supplementary material for: Genome sequencing of two Neorhizobium galegae strains reveals a noeT gene responsible for the unusual acetylation of the nodulation factors
Source: PubMed Central journal article supplement (PMC4085339; doi:10.1186/1471-2164-15-500), 2014-06-19
Supplement: 12864_2014_6200_MOESM1_ESM.pdf [file 12864_2014_6200_MOESM1_ESM.pdf]

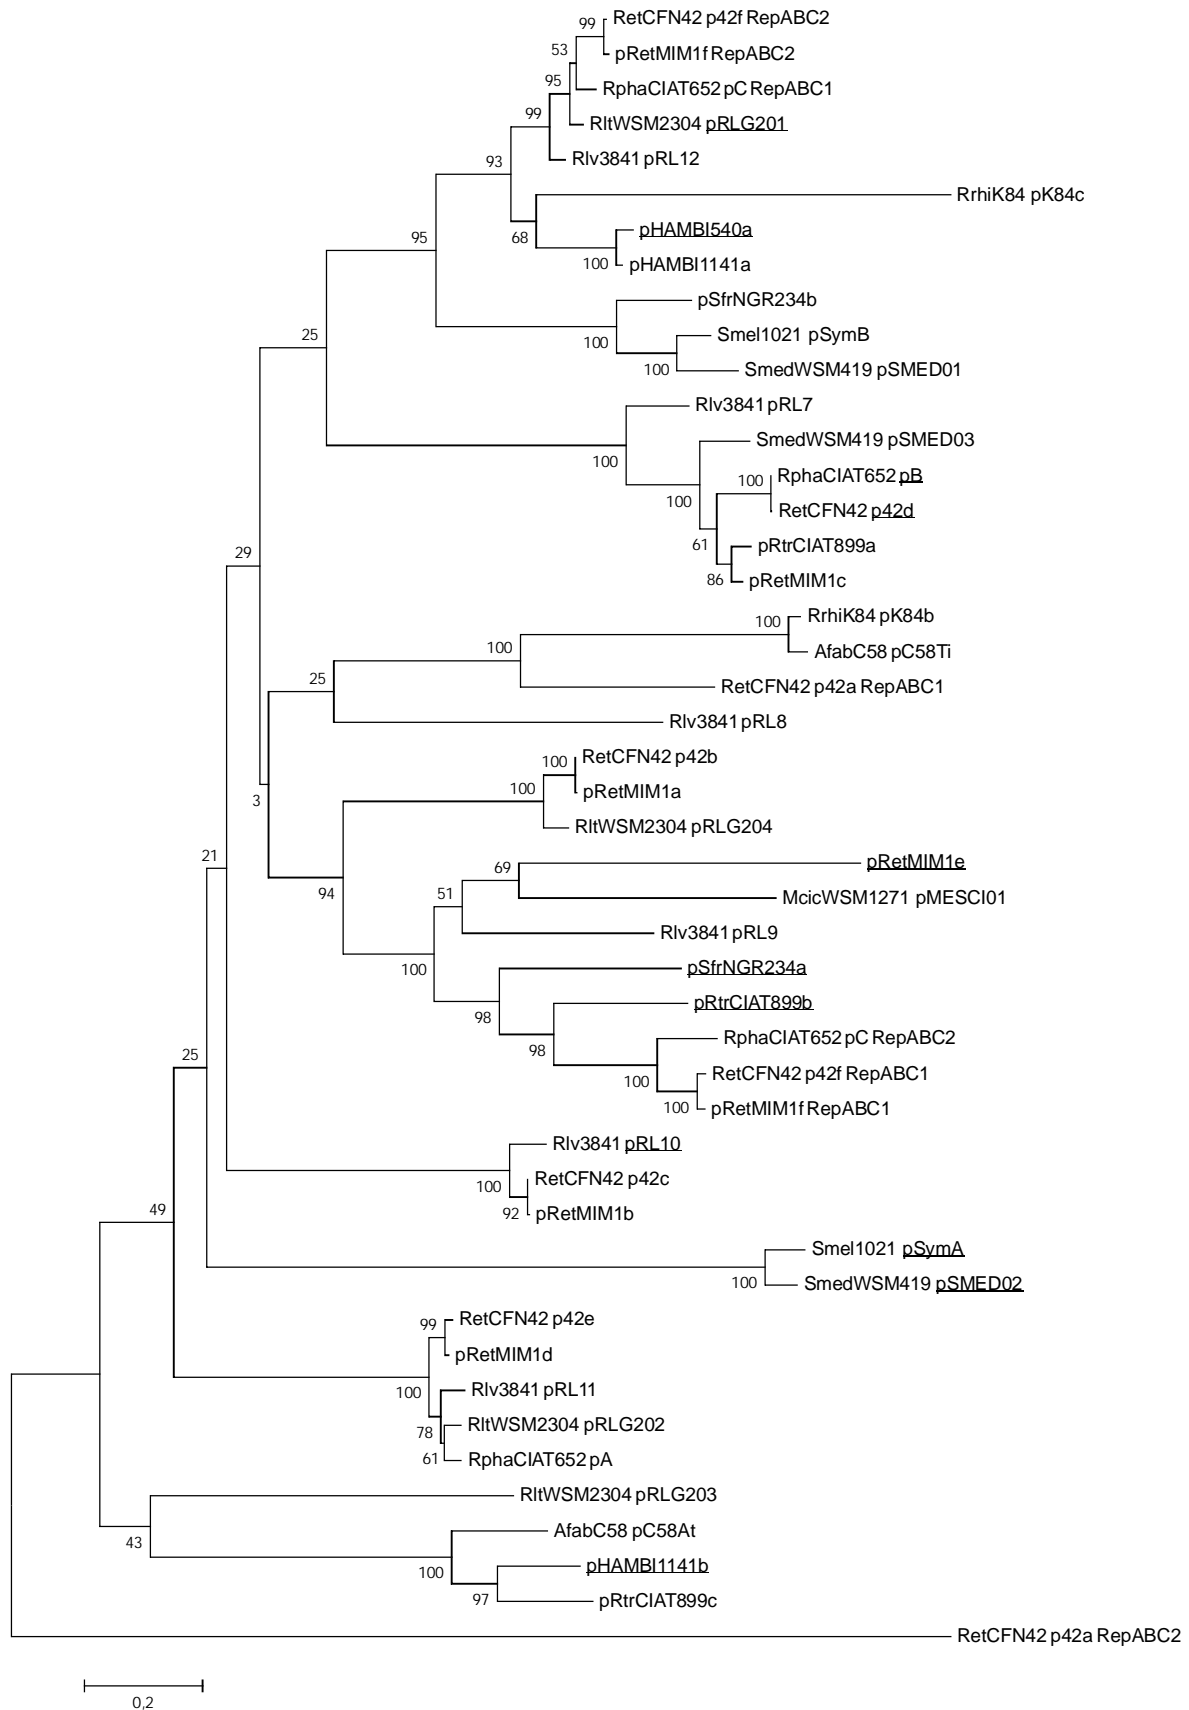

**Figure S3.** Phylogeny of concatenated RepABC proteins of replicons with this replication system in *N. galegae* strains HAMBI 540<sup>T</sup> and HAMBI 1141, together with 12 strains representing *Rhizobium*, *Sinorhizobium*, *Mesorhizobium* and *Agrobacterium*. For those replicons which have multiple *repABC* operons, the operon is indicated. Replicons containing symbiosis genes are underlined. Rlv3841; *R. leguminosarum* sv. viciae 3841, RltWSM2304; *R. leguminosarum* sv. trifolii WSM2304, RtrCIAT899; *R. tropici* CIAT 899, RphaCIAT652; *R. phaseoli* CIAT 652, RetMIM1; *R. etli* sv. mimosae str. Mim1, RetCFN42; *R. etli* CFN 42, SfrNGR; *S. fredii* NGR234, Smel1021; *S. meliloti* 1021, SmedWSM419; *S. medicae* WSM419, McicWSM1271; *M. ciceri* sv. biserrulae WSM1271, RrhiK84; *R. rhizogenes* K84, AfabC58; *A. fabrum* C58. The evolutionary history was inferred by using the Maximum Likelihood method. Bootstrap values are shown next to the branches.

COG categories

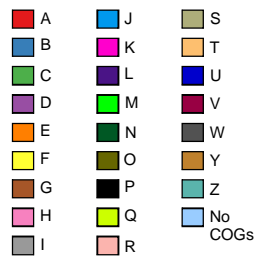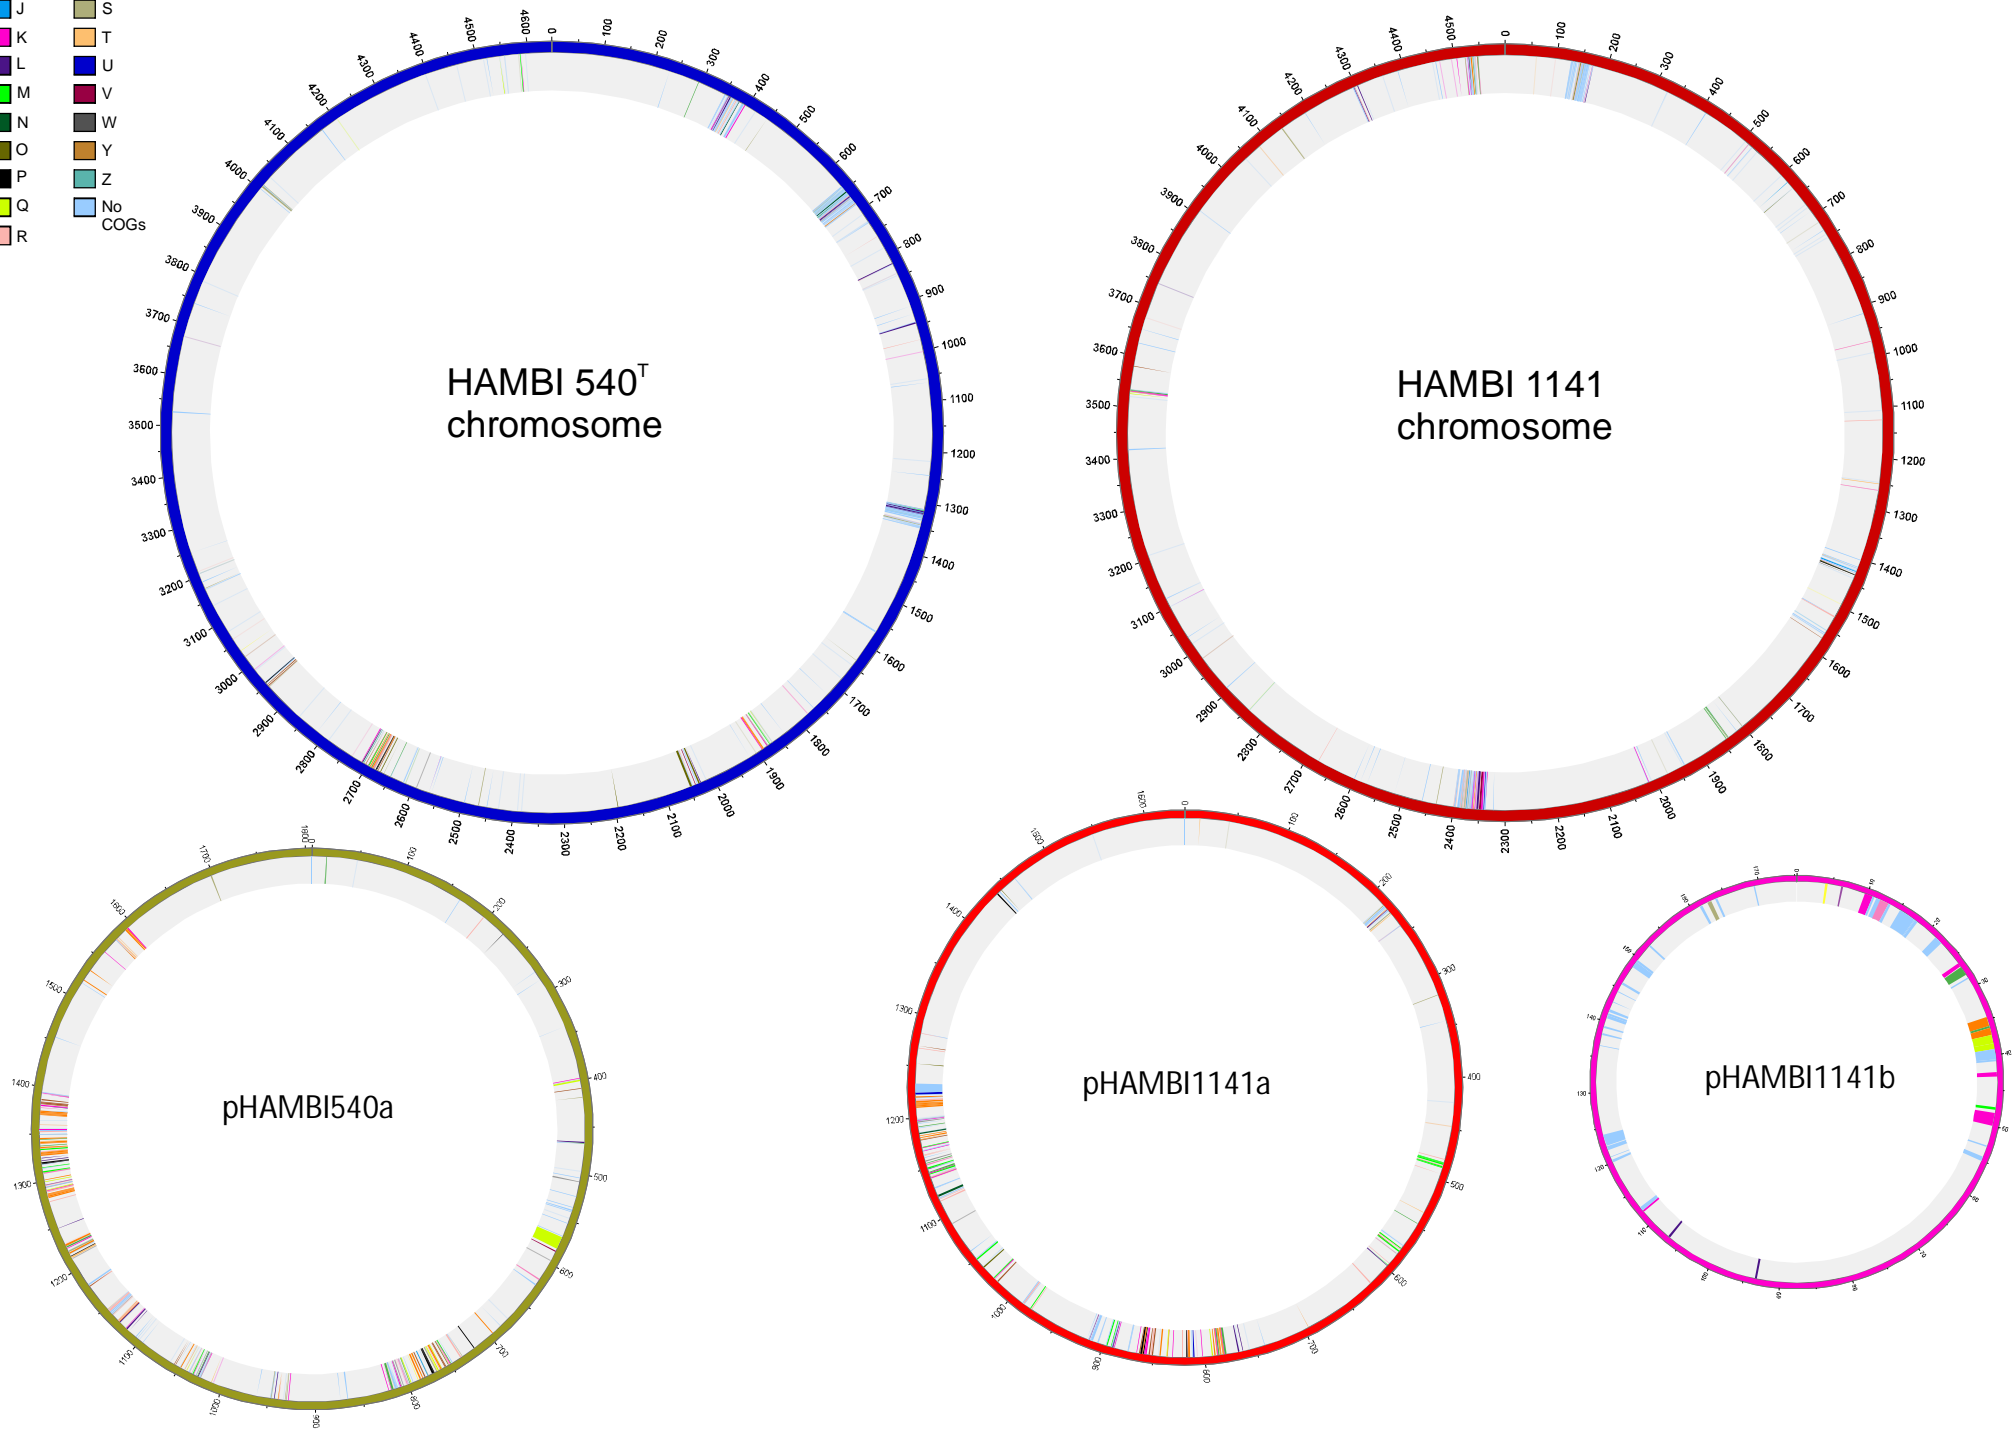

**Figure S4.** Illustration of the location singletons identified in the genomes of *N. galegae* HAMBI 540<sup>T</sup> and HAMBI 1141 in the OrthoMCL analysis.

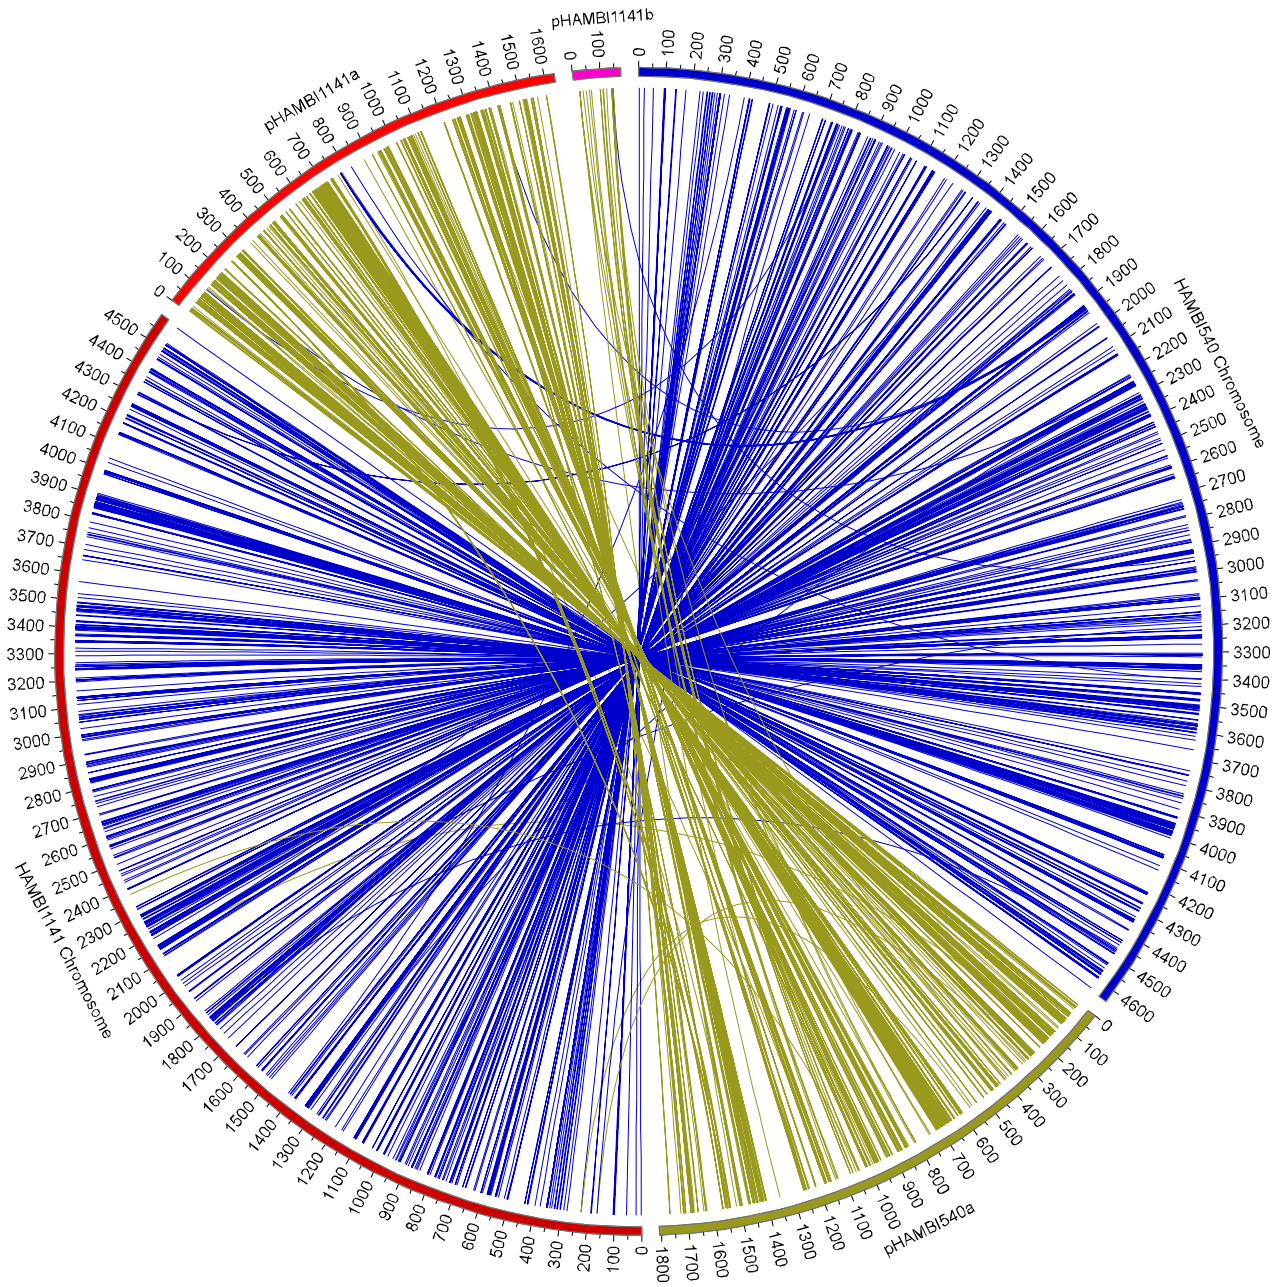

**Figure S5.** Orthologous genes of *N. galegae* strains HAMBI 540 and HAMBI 1141.

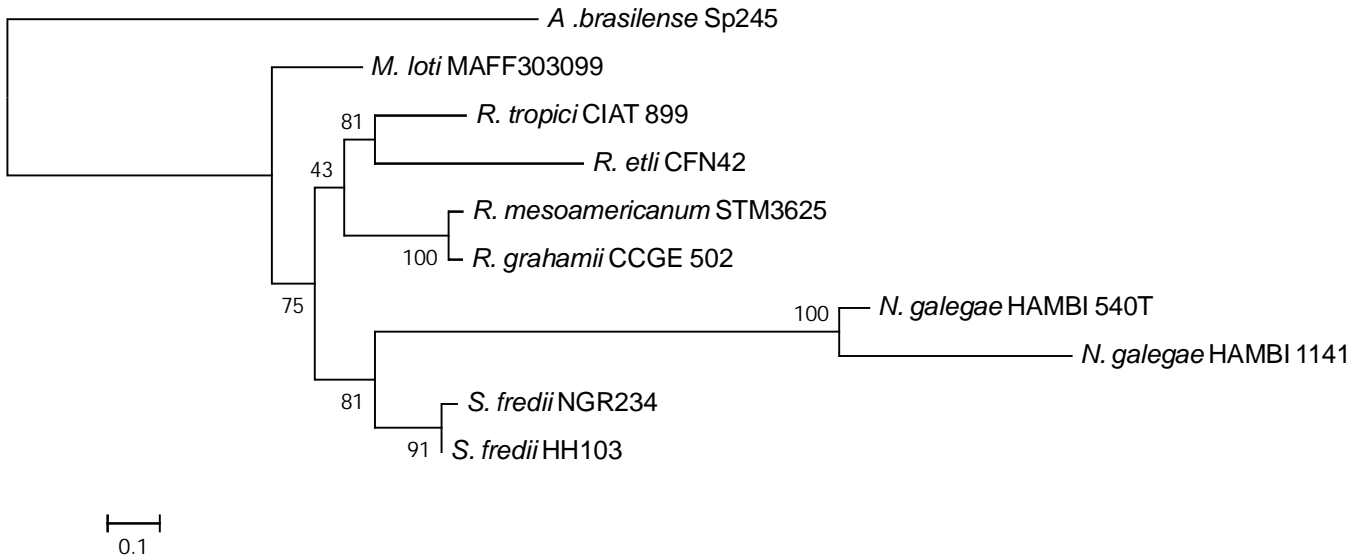

**Figure S6.** NifQ ML tree used for PAML analyses.

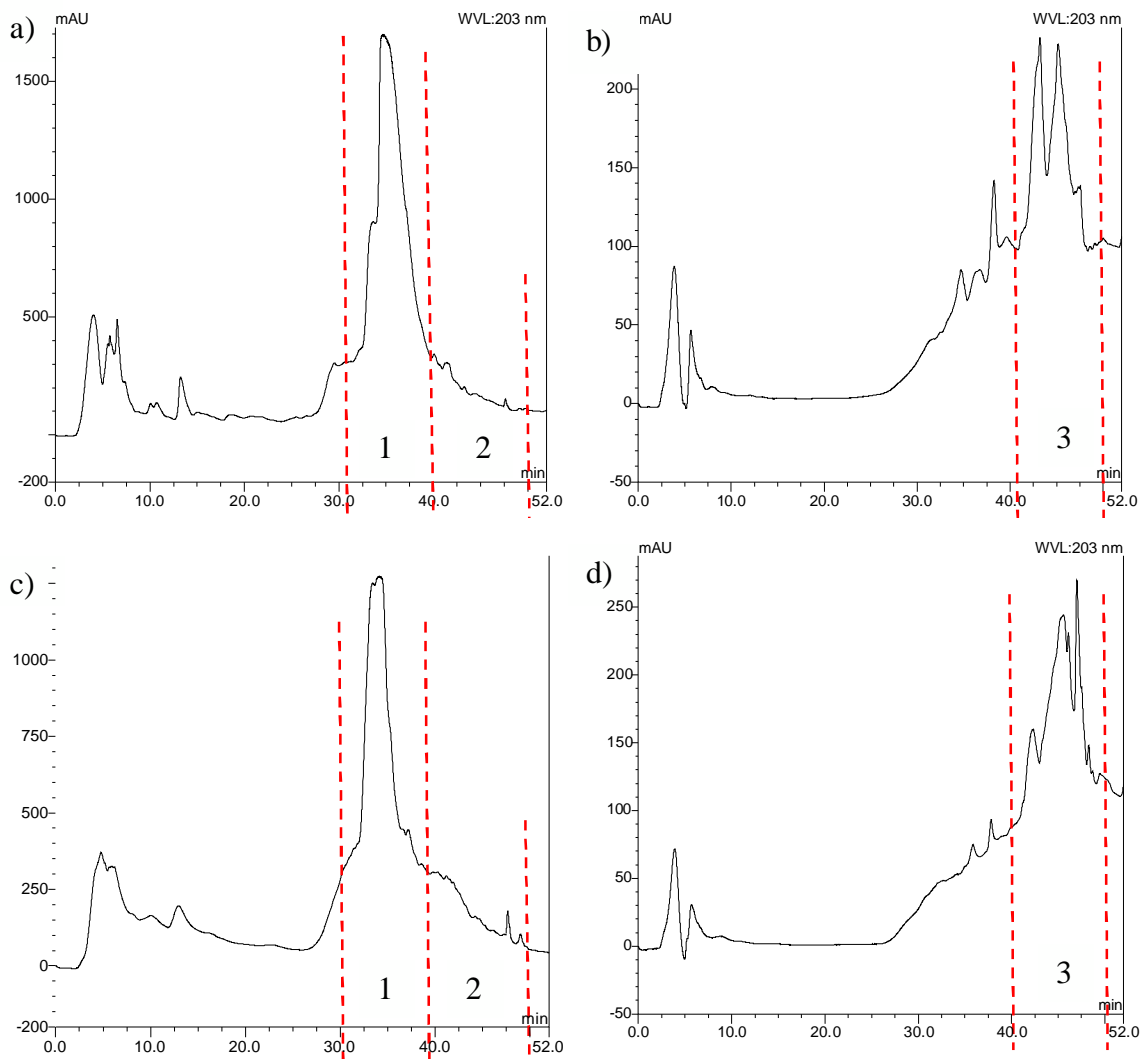

**Figure S7.** RP-HPLC fractionation of *N. galegae* HAMBI 1174 and *noeT* mutant strain LCO-containing SPE fractions. a) HAMBI 1174 (45 % SPE fraction) b) HAMBI 1174 (60 % SPE fraction), c) *noeT* mutant (45 % SPE fraction) d) *noeT* mutant (60 % SPE fraction). Regions 2 and 3 correspond to known elution positions for LCOs.
