# Supplementary material for: Genome sequencing of two Neorhizobium galegae strains reveals a noeT gene responsible for the unusual acetylation of the nodulation factors
Source: PubMed Central journal article supplement (PMC4085339; doi:10.1186/1471-2164-15-500), 2014-06-19
Supplement: 12864_2014_6200_MOESM2_ESM.pdf [file 12864_2014_6200_MOESM2_ESM.pdf]

## 1 **Additional file 2: Detailed materials and methods**

### 2 **DNA isolation for genome sequencing**

3 Cells were grown to stationary phase and harvested by centrifugation in 40 mL aliquots. Harvested  
4 cells were washed and resuspended in 2 mL of 100 mM Tris 50 mM EDTA pH 8.0. Then, 20 µL of  
5 1 M β-mercaptoethanol was added, followed by 200 µl of 10 % SDS. Tubes were inverted to mix  
6 and cells were lysed for 5 min. Next, 200 µl of 5 M NaCl was added and tubes incubated at 65 °C  
7 for 10 min, thereafter 875 µL of 5 M KAc (3 M K<sup>+</sup>/5 M Ac<sup>-</sup> pH 5.5) was added and the tubes  
8 incubated on ice for at least 20 minutes before addition of 3250 µl of chloroform:2-octanol (24:1)  
9 solution. The samples were inverted to mix and 250 µL of CTAB/NaCl (10 % CTAB/0.7 M NaCl)  
10 solution added. Tubes were incubated at 65 °C for 10 minutes, then centrifuged at 10,000 x g for 5  
11 min at +4 °C. The water phase was transferred to a new tube, mixed with an equal volume of fresh-  
12 made phenol:chloroform (1:1) and re-centrifuged. The water phase was transferred to a new tube,  
13 mixed with an equal volume of ice-cold chloroform:2-octanol (24:1) and re-centrifuged. The water  
14 phase was then mixed with an equal volume of RT isopropanol and incubated at -20 °C for at least  
15 1 h before the DNA sample was collected either by catching it on a glass hook or by centrifugation  
16 (10 000 x g, +4 °C, 30 min). The DNA was washed with 70 % ethanol, air dried and suspended in a  
17 suitable volume of ultrapure H<sub>2</sub>O.

### 18 **Genome sequencing**

19 Genomic DNA (1 µg) was fragmented in a microTube (100 µL) using Covaris S2 (LGC Genomics).  
20 Half of the fragmented DNA (50 µL) was purified using a MinElute Reaction Cleanup kit (Qiagen)  
21 and eluted in 25 µL EB buffer. End repair and A-tailing was done on the purified DNA (25 µL)  
22 using DNA T4 Polymerase (7.5 U), T4 Polynucleotide Kinase (25 U), dNTP (0.2 mM), DreamTaq  
23 DNA Polymerase (1.25 U), ATP (5 mM), 2.5 µL T4 Polynucleotide Kinase Buffer A (10x) and 5  
24 µL T4 DNA Polymerase Buffer, in a total volume of 50 µL (all enzymes from Fermentas). The  
25 reaction was incubated for 20 min at 25 °C, 20 min at 72 °C and 10 min at 4 °C. The reaction was

26 purified using AMPure XP (Beckman Coulter Inc.) and eluted in 32  $\mu$ L water. Y-Adapters (2  $\mu$ L  
27 20  $\mu$ M) were ligated to the purified end-repaired DNA using 4  $\mu$ L T4 DNA Ligase buffer (10x), 2  
28  $\mu$ L T4 DNA Ligase (30 U/ $\mu$ L) in a total volume of 40  $\mu$ L (enzyme from Fermentas) and incubation  
29 for 1 h at 25  $^{\circ}$ C. The Y-adapters used for HAMB1 540<sup>T</sup> were 5'-  
30 TTCGTATCGCCTCCCTCGCGCCATCAGAGCACTGTAGT -3' and 5'- Phosphate-  
31 CTACAGTGCTCTGAGCGGGCTGGCAAGGCGCATAG -3', and for HAMB1 1141 5'-  
32 TTCGTATCGCCTCCCTCGCGCCATCAGATCAGACACGT -3' and 5'- Phosphate-  
33 CGTGTCTGATCTGAGCGGGCTGGCAAGGCGCATAG -3'. The ligation reaction was purified  
34 using AMPure XP and eluted in 25  $\mu$ L water. A final PCR was done in a 200  $\mu$ L reaction using  
35 DreamTag DNA Polymerase (5 U), 8 pmol A- and B-adaptor primers (A,  
36 5'CGTATCGCCTCCCTCGCGCCAT; B, 5'CTATGCGCCTTGCCAGCCCGCT) and 25  $\mu$ L  
37 purified ligation reaction. The PCR cycle was 95  $^{\circ}$ C for 3 min, 6 cycles of 95  $^{\circ}$ C for 30 s, 60  $^{\circ}$ C for  
38 30 s and 72  $^{\circ}$ C for 1 min, and final extension at 72  $^{\circ}$ C for 5 min. The PCR reaction was purified  
39 using AMPure XP and eluted in a volume of 20  $\mu$ L. The library was checked using Bioanalyzer on  
40 a DNA High Sensitive chip (Agilent Technologies). The concentration was measured using a High  
41 Sensitive kit on Qubit (Invitrogen).

42 The 454 sequencing was done according to the manufactures instructions using an  
43 Amplicon Lib-A emPCR kit and Titanium Sequencing kit (Roche). SOLiD mate-pair libraries were  
44 constructed using a Mate-Paired Library Preparation kit (Life Technologies). From 10  $\mu$ g of starting  
45 material sheared using Covaris S2, libraries were made with insert size 1.5 – 3.5 kb. The obtained  
46 libraries were run (50 bp + 50 bp) on a SOLiD 4 DNA Sequencer (Life Technologies). The PacBio  
47 libraries (8-10 kb, sheared using g-TUBE, LGC Genomics) were constructed using Library kit from  
48 Pacific Biosciences. Two SMRT cells from each strain were run on a PacBio RS instrument (Pacific  
49 Biosciences).

50 The obtained 454 sequences were assembled using Newbler (Roche) yielding a coverage  
51 of 17x for HAMBI 1141 and 22x for HAMBI 540<sup>T</sup>. The SOLiD mate-pair reads were used to  
52 correct the 454 contigs in homopolymer regions and to order the contigs into scaffolds. PCR  
53 primers were designed to contig ends and successful PCR products were sequenced using BigDye  
54 Chemistry V 3.1 and analysed on an ABI 3130xl capillary sequencer (Life Technologies). Gap4 in  
55 the Staden Package [1] was used for editing and manual closing of contig gaps. Gaps that we were  
56 not able to close with PCR were closed using the long reads from PacBio which spanned the whole  
57 gap. To verify the correctness of the assembly all PacBio reads were mapped to the assembled  
58 sequence.

### 59 **Analysis of evolutionary history of RepABC**

60 Evolutionary analysis of concatenated RepABC proteins of replicons with this replication system in  
61 *N. galegae* strains HAMBI 540<sup>T</sup> and HAMBI 1141, together with 12 strains representing  
62 *Rhizobium*, *Sinorhizobium*, *Mesorhizobium* and *Agrobacterium*, was conducted in MEGA [2].  
63 Accession numbers of the sequences used are listed in Table S3. The evolutionary history was  
64 inferred by using the Maximum Likelihood method based on the Jones et al. w/freq. model [3]. The  
65 tree with the highest log likelihood (-32712.5611) is shown in Figure S5. The percentage of trees in  
66 which the associated taxa clustered together based on bootstrap with 1000 replicates is shown next  
67 to the branches. A discrete Gamma distribution was used to model evolutionary rate differences  
68 among sites (5 categories (+G parameter = 1.3269)). The tree is drawn to scale, with branch lengths  
69 measured in the number of substitutions per site. All sequence positions containing gaps and  
70 missing data were eliminated. There were a total of 871 positions in the final dataset.

### 71 **Analyses of substitution rates and positive selection**

72 The codeml program included in the PAML 4 package [4] was used for analysis of synonymous and  
73 non-synonymous substitutions in the protein-coding sequences of the genes shared by HAMBI 540<sup>T</sup>  
74 and HAMBI 1141 in the symbiosis gene region. The ratio of non-synonymous to synonymous

75 substitution rates ( $d_N/d_S$  or  $\omega$ ) was determined as ML estimation of pairwise comparisons, where  
76 one  $\omega$  was estimated over the whole gene. Sites with ambiguity characters were removed.

77 For the putative *nifQ* gene, the analysis was expanded to a phylogeny of 10  $\alpha$ -  
78 proteobacterial strains (*Azospirillum brasilense* Sp245 [HE577327.1:1280546..1281172] as  
79 outgroup, *R. galegae* HAMBI 540<sup>T</sup>, *R. galegae* HAMBI 1141, *Rhizobium etli* CFN 42  
80 [U80928.5:279761..280471], *Sinorhizobium fredii* NGR234 [U00090.2:148068..148760], *S. fredii*  
81 HH103 [CP003565.1:128216..128935], *Rhizobium tropici* CIAT 899  
82 [CP004017.1:265351..266007], *Mesorhizobium loti* MAFF303099 [NC\_002678.2:  
83 4741411..4742058], *Rhizobium mesoamericanum* STM3625 [CANI01000088.1:30510..31142] and  
84 *Rhizobium grahamii* CCGE 502 [AEYE02000038.1:26425..27114]) in order to investigate whether  
85 positive selection influenced the divergence of *R. galegae nifQ* from the homologs of other  
86 rhizobia. The ML phylogenetic tree used as the base for the analyses was constructed from NifQ  
87 protein sequences using PhyML [5] at [www.phylogeny.fr](http://www.phylogeny.fr) (19.9.2013), with default options. The  
88 unrooted tree without branch lengths was used for codeml analyses. The *nifQ* sequences were  
89 analysed for variation in the ratio of non-synonymous to synonymous substitution rates among  
90 branches in the NifQ tree, to investigate whether there has been positive selection affecting the  
91 evolution of *nifQ* in *R. galegae*. After deletion of alignment gaps, 501 sites were included in the  
92 analysis. The null hypothesis ( $H_0$ ) was that  $\omega$  is identical across all branches of the *nifQ* phylogeny,  
93 i.e. the changes in *R. galegae nifQ* are simply due to an underlying increase in the mutation rate.  
94 This null hypothesis was compared to two alternative hypotheses:  $H_1$ :  $\omega$  is variable, being greater  
95 than 1 in the branch leading to the two *R. galegae* strains, i.e. there has been a burst of positive  
96 selection for functional divergence in that branch and  $H_2$ : there has been increased nonsynonymous  
97 substitution in both *R. galegae* lineages following divergence from *S. fredii*; hence the assumption  
98 of one  $\omega$  for all branches leading to *R. galegae* and another for the other species. The positive

99 selection hypothesis was tested against the null hypothesis of neutral evolution through a likelihood  
100 ratio test (LRT). Twice the log likelihood difference was compared with  $\chi^2$  with d.f. = 1.

### 101 ***noeT* mutant construction**

102 The  $\Delta noeT::\Omega$ -Km mutant (strain HAMBI 3275) was constructed by marker exchange where the  
103 *noeT* gene was replaced with the  $\Omega$ -Km interposon [6] containing the *nptII* gene. A 1089-bp  
104 upstream flanking region of *noeT* (the *noeT* left arm) was amplified with primers HsnTLRBamHI  
105 and HsnTLLSpeI-418 and a 1142-bp downstream flanking fragment (the *noeT* right arm) was  
106 amplified with primers HsnTRLBamHI and HsnTRRXhoI-4553, using Phusion polymerase  
107 (Thermo Scientific). These fragments contained short regions of the 5' and 3' ends respectively, of  
108 the gene. The primers contained restriction endonuclease sites (BamHI and SpeI for the left arm and  
109 BamHI and XhoI for the right arm) to facilitate directional cloning. The  $\Omega$ -Km interposon was  
110 released from pHP45 $\Omega$ -Km [6] by BamHI digestion, purified and ligated along with the PCR  
111 products (digested with BamHI + SpeI and BamHI + XhoI respectively and purified) into  
112 pJQ200SK that had been digested with SpeI and XhoI and dephosphorylated. The resulting  
113 construct (pRg103) where the  $\Omega$ -Km interposon was inserted between the two PCR products was  
114 transferred into *Escherichia coli* S17-1  $\lambda$ pir by electroporation (ca 20 ng of pRg103 into 40  $\mu$ L of  
115 electrocompetent cells, electroporation at 2.5 kV, 25  $\mu$ F and 200  $\Omega$  in 0.2 cm spaced cuvettes) and  
116 confirmed by sequencing (sequencing primers T3and hsnTL-655 for the left arm; M13 UP and  
117 hsnTR-488 for the right arm). The verified construct was then transferred from *E. coli* S17-1  $\lambda$ pir  
118 into *R. galegae* HAMBI 1174 by biparental spot mating. Mating was conducted by mixing 1 mL of  
119 stationary-phase recipient with 1 mL of donor, pelleting the cells, followed by resuspension in 50  $\mu$ L  
120 of MilliQ water and spotting on a plain TY plate. Exconjugants were plated onto TY agar  
121 containing 5 % sucrose and neomycin (25  $\mu$ g/mL), to select for cells in which the suicide plasmid  
122 had been inserted and pJQ200SK removed via recombination events. Mutant candidate clones were  
123 colony purified and tested for sensitivity to gentamicin. The final neomycin resistant, gentamicin

124 sensitive gene replacement mutant, designated HAMBI 3275, was further confirmed by PCR  
125 analysis and sequencing. The insert-flanking regions were amplified with three different sets of  
126 primers: hsnTmutLL and hsnTmutLR amplifying from within the *Rhizobium* DNA upstream of the  
127 left arm to the 5' end of the interposon; primers hsnTmutRL and hsnTmutRR amplifying a fragment  
128 from within the 3' end of the interposon to the *Rhizobium* DNA downstream of the right arm;  
129 primers hsnTcomF and hsnTcomR amplifying from within the left arm through the  $\Omega$ -Km fragment  
130 into the right arm. These PCR fragments were sequenced over the junctions to confirm that  
131 homologous recombination had worked properly. PCR primers used in this work are listed in Table  
132 S4.

### 133 **Nod factor analysis**

134 For extraction of Nod factors from the *R. galegae* HAMBI 1174 *noeT* mutant (HAMBI 3275) and  
135 the wild-type parental HAMBI 1174 strain cultures, the strains were grown in 3.15 litres (in aliquots  
136 of 350 mL) of def8 medium [7] supplied with neomycin (25  $\mu$ g/mL), streptomycin (500  $\mu$ g/mL)  
137 and apigenin at a final concentration of 1  $\mu$ M as inducer of *nod* gene expression. The cultures were  
138 incubated at +28 °C on a rotary shaker at 120 rpm. When the cultures reached an OD<sub>600</sub> value of 1,  
139 the cells were spun down at 6000 x g for 15 min at +4 °C, the supernatants were mixed with 0.3  
140 volumes of 1-butanol (Sigma-Aldrich) and stirred for 2 to 3 h. The phases were then allowed to  
141 separate overnight before the 1-butanol phase was collected and the samples dried using a rotary  
142 evaporator (Büchi Rotavapor R-200 with a vacuum controller V-800).

143 The crude Nod factor extracts were resuspended in 20 mL of 60 % (v/v) acetonitrile  
144 (ACN) (aq) and shaken overnight. Then 10 mL of this solution was diluted with water to a final  
145 concentration of 20 % (v/v) ACN (aq). The solution was pre-fractionated using solid phase  
146 extraction (SPE) with a C18 cartridge (strata C18-E 70 Å, 5 mL). The Nod factors were eluted from  
147 the SPE cartridge with two different ACN (aq) solutions, 45 % and 60 % (v/v), to produce two  
148 fractions (5 mL). These SPE fractions were dried down under vacuum, then reconstituted in 700  $\mu$ L

149 of 60 % (v/v) ACN (aq) overnight. Prior to reversed-phase high performance liquid chromatography  
150 (RP-HPLC), the reconstituted SPE fractions were diluted with water to a final volume of 2 mL.  
151 HPLC fractionation was carried out on a C<sub>18</sub> column (Waters Spherisorb 5µm ODS2, 4.6 x 250  
152 mm) with two subsequent 1 mL injections, eluted using a gradient (20 % ACN (aq) for 20 min, a  
153 gradient of 20 % to 60 % ACN (aq) over 20 min) followed by 90 % ACN (aq) for 5 min and 20 %  
154 ACN (aq) for 5 min to allow for column re-equilibration. HPLC fractions were collected every  
155 minute from the column, eluted at 1 mL min<sup>-1</sup>. The HPLC fractions corresponding to peaks in UV  
156 absorbance of 203 nm were dried under vacuum. The fractions were reconstituted in 50 µL of  
157 ACN:H<sub>2</sub>O (1:1, v/v) prior to mass spectrometric analysis.

158           Electrospray ionisation (ESI) mass spectrometric analysis was performed on an Applied  
159 Biosystems QSTAR hybrid quadrupole time of flight (QqTOF) tandem mass spectrometer equipped  
160 with an ESI source. Analysis was carried out in the positive ion mode. TOF mass spectra were  
161 recorded over the range  $m/z$  100-1500 and tandem mass spectra were recorded over the range  $m/z$   
162 100-1500 with the 'collision offset' set at 80 V. Data were recorded using the Analyst software  
163 (version 1.1). Matrix-assisted laser desorption/ionisation (MALDI) QqTOF mass spectrometric  
164 analysis was performed on an Applied Biosystems QSTAR hybrid QqTOF tandem mass  
165 spectrometer equipped with an *o*-MALDI source. Analysis was carried out in the positive ion mode.  
166 TOF mass spectra were recorded over the range  $m/z$  600-3000 and tandem mass spectra were  
167 recorded over the range  $m/z$  200-3000 with the 'collision offset' set at 80 V. The sample spots on  
168 the MALDI plate were irradiated with a nitrogen UV laser (337 nm wavelength) with a pulse rate of  
169 20 Hz. The power level was 100 µJ. Data were recorded with the Analyst software (version 1.1).

170           Aliquots (20 µL) of the HPLC fractions containing *O*-acetylated nod factors were dried  
171 under vacuum. Methanol (250 µL) and concentrated ammonia (35 % v/v, 250 µL) were added to  
172 each aliquot, mixed, and were left overnight. The fractions were dried under vacuum and then  
173 reconstituted in 50 µL of ACN:H<sub>2</sub>O (1:1, v/v) prior to MALDI mass spectrometric analysis.

174 **Plant tests of the *noeT* mutant**

175 For nodulation tests, seeds of *G. orientalis*, *Trifolium repens* cv. Milka, *Pisum sativum* cv.  
176 Afghanistan (provided by Mike Ambrose, John Innes Centre), *Phaseolus vulgaris* var. Nanus, *Vicia*  
177 *hirsuta* and *A. sinicus* were surface sterilised by washing the seeds in 96 % ethanol for 1 minute, 3  
178 % sodium hypochlorite for 3-5 minutes and washing with sterile water 5-6 times for 1-2 minutes.  
179 The sterilised seeds were germinated on TY or YEM agar plates at room temperature in darkness.  
180 *G. officinalis* seeds were surface sterilised by the following procedure: washed with concentrated  
181 sulphuric acid for 15 minutes, rinsed with sterile water 8 times for 2 minutes, kept in 96 % ethanol  
182 for 1 minute and finally washed with sterile water 6 times for 2-5 minutes.

183 In order to compare the nodulation phenotype of the *noeT* mutant to the wild-type parental  
184 strain, *G. orientalis* seeds were transferred into separate test tubes (2 cm diameter, 15 cm high)  
185 containing 10-12 mL of quarter-strength nitrogen-free Jensen medium [8] and inoculated with 20  
186 fL of late log-phase HAMBI 1174 or mutant culture. Initially 20 seedlings were prepared of each  
187 kind, but one mutant-inoculated plant was later discarded due to clearly abnormal growth. Prior to  
188 inoculation the bacterial cultures were re-suspended in sterile MilliQ water. Cultures in which  
189 antibiotics had been used were washed once in an equal volume of sterile MilliQ water before final  
190 re-suspension. Negative control seedlings were inoculated with 20 fL of sterile MilliQ water.  
191 Nodule formation was recorded from tubes daily during the first 23 days post inoculation (dpi), then  
192 sporadically until 40 dpi. IBM SPSS Statistics for Windows version 20.0 (Armonk, NY: IBM  
193 Corp.) was used for analyses of statistical significance.

194 **Conjugation experiments**

195 Strains used to test the conjugative properties of *N. galegae* sv. *officinalis* strain HAMBI 1141 are  
196 listed in Table S1. Culture media were supplemented with appropriate antibiotics at the following  
197 concentrations: ampicillin (Ap) 100 µg/mL, gentamicin (Gm) 25 µg/mL, kanamycin (Km) 50  
198 µg/mL, neomycin (Nm) 25 or 50 µg/mL, rifampicin (Rf) 150 µg/mL, spectinomycin (Spc) 500



199  $\mu\text{g/mL}$ , streptomycin (Sm) 1000  $\mu\text{g/mL}$ , tetracycline (Tc) 10  $\mu\text{g/mL}$ . The GusA substrate X-Gluc  
200 (5-bromo-4-chloro-3-indoxyl- $\beta$ -D-glucuronidase) was supplied at 50  $\mu\text{g/mL}$ . Media of *E. coli* ST18  
201 were supplemented with 50  $\mu\text{g/mL}$  of 5-aminolevulinic acid (ALA).

202           Biparental mating of HAMBI 1207 and HAMBI 1587 was done by growing the  
203 cultures to an  $\text{OD}_{600}$  of about 1, then mixing 1mL of HAMBI 1207 culture with 1 mL of HAMBI  
204 1587 and resuspending the combined pellet in 100 fL  $\text{H}_2\text{O}$ . Spot mating was performed by adding  
205 the resuspended cells onto a TY plate and incubating at +28 °C for 48 h. The spot was then  
206 resuspended in 1 mL  $\text{H}_2\text{O}$  and dilutions  $10^{-2}$  to  $10^{-6}$  were made. A 100 fL aliquot of each dilution  
207 was spread onto TY+Nm plates and incubated at +28 °C for 3 days. The remaining 990 fL of the  
208 undiluted mating spot suspension was centrifuged and resuspended in 100 fL  $\text{H}_2\text{O}$ , spread onto a  
209 TY+Nm plate and incubated at +28 °C for 3 days (hereafter called "undiluted" plate). Plates  $10^{-6}$   
210 (385 colonies) and the "undiluted" plate were used for inoculation of plants. There were 5 replicates  
211 for each type to test: undiluted exconjugants on *G. orientalis*, undiluted exconjugants on *G.*  
212 *officinalis*,  $10^{-6}$  diluted exconjugants on *G. orientalis* and *G. officinalis*. One negative control was  
213 prepared for each test type. *G. orientalis* and *G. officinalis* seeds were sterilised and germinated as  
214 described in section "Plant tests of the *noeT* mutant". All colonies on the  $10^{-6}$  and "undiluted" plates  
215 were suspended in  $\text{H}_2\text{O}$ . The  $\text{OD}_{600}$  of the "undiluted" suspension was 2.4. Single plants in glass  
216 tubes (sterilized glass test tubes with each tube containing one seedling on a metal mesh covered  
217 with about 10-12 mL of quarter-strength nitrogen-free Jensen nutrient solution [8]) were inoculated  
218 with 20 fL per plant of either suspension, or sterile water for the controls. Inoculated plants were  
219 maintained in a growth chamber (20°C for 1 h, 24 °C for 16 h, 20 °C for 1h and 16°C for 6h). After  
220 3 to 4 weeks, nodules were isolated from plants, sterilised (using the same procedure as for *G.*  
221 *orientalis* seeds) and crushed in 100 fL  $\text{H}_2\text{O}$ . From this, 50 fL was streaked onto both a plain TY  
222 plate and a TY+Sm+Nm plate, and incubated at +28 °C for 3 days. From the colonies that arose on  
223 the selective plates, single colonies were used to inoculate TY broths for re-inoculation on the same

224 plants to check that nodulation occurs again. The OD<sub>600</sub> values of cultures used for re-inoculation  
225 was 0.8 to 1.0. Again, 20 fL of each culture was used to inoculate single plants in tubes.

226           After 6 weeks, nodules were observed only on those plants inoculated with "undiluted"  
227 samples. Nodules were isolated, sterilised and bacteria isolated and spread onto selective plates  
228 using the same procedure as previously. Arising colonies were purified on new selective plates, and  
229 5 transconjugant clones (two isolated from *G. orientalis* and 3 isolated from *G. officinalis*) were  
230 retained for further experiments. These transconjugant clones were tested once more on both *G.*  
231 *orientalis* and *G. officinalis*, in jar experiments. Jars were prepared by filling them with leca gravel  
232 (4-10 mm), sand (0.5-1.2 mm) and vermiculite (1-2 mm) mixed at a ratio of 3:5:5. Jars were then  
233 sterilised at 160 °C for 24 h. Germinated seeds were transferred to jars aseptically, 3 seeds per jar.  
234 Jars had been moistened beforehand with 125 mL of quarter-strength nitrogen-free Jensen nutrient  
235 solution, and 50 mL H<sub>2</sub>O was added after covering the seeds. The plants were provided with 30-40  
236 mL of quarter-strength Jensen nutrient solution twice a week. Control jars of HAMBI 1587 on both  
237 *G. orientalis* and *G. officinalis* were also prepared. All plants were grown for 4 weeks before roots  
238 were examined for nodules. A modified Eckhardt gel [9] was run to confirm the plasmid profile of  
239 the 5 transconjugants. The transconjugant strains as well as their reference strains were grown  
240 overnight in HP medium [16] to an OD<sub>600</sub> of approximately 0.3. Bacterial cultures of 250 µL for  
241 each strain were added to 500 µL of a 0.3 % (w/v) Sarkosyl solution. Each sample was mixed,  
242 pelleted by centrifugation for 4 min and resuspended in 25 µL of lysis solution (10 % (w/v) sucrose,  
243 100 µg/mL lysozyme, 10 µg/mL RNase in Tris-EDTA (TE) or 1 x TBE buffer). The resuspensions  
244 were mixed with 5 µL of 6 x DNA Loading Dye and immediately loaded onto a 0.7 % agarose gel  
245 containing 1 % (w/v) SDS in 1 x TBE buffer. Electrophoresis was performed at 60 V (ca. 20 mA) at  
246 4 °C for 16-18 h. The gel was stained for 30 min in a 0.1 µg/mL ethidium bromide solution prior to  
247 imaging. This analysis confirmed that each of the isolates had obtained the smaller plasmid from  
248 strain HAMBI 1207.

249 Similar biparental matings were performed between HAMBI 1207 and HAMBI 1218,  
250 HAMBI 1141 and HAMBI 1213, HAMBI 1141 and HAMBI 1594 to study the transfer of the  
251 symbiosis plasmid to other rhizobial species. Exconjugants of these matings were all inoculated on  
252 *G. officinalis* but also on *M. sativa* when HAMBI 1218 or HAMBI 1213 was the donor, or on *V.*  
253 *villosa* when HAMBI 1594 was the donor. *M. sativa* and *V. villosa* seeds were sterilized using the  
254 same method as used for *G. orientalis*, with an additional incubation in water for 4 h for *V. villosa*  
255 prior to transfer of the seeds to TY plates. Inoculations were done by applying 20 fL of  
256 resuspended cells onto single plants in glass tubes.

257 A deletion mutant was constructed in HAMBI 1141 to study the impact of the T4SS  
258 located on the chromid, on conjugation of the symbiosis plasmid. To incorporate *lox* sites flanking  
259 the HAMBI1141 deletion target, the T4SS on the chromid, an upstream sequence of 1331 bp and a  
260 downstream sequence of 1658 bp were amplified using designed primers pairs (ZZ01-ZZ08 for the  
261 upstream fragment and ZZ03-ZZ04 for the downstream fragment) having a BamHI restriction site  
262 incorporated in the forward primers and a NotI site in the reverse primers (Table S4). PCR was  
263 done using Phusion Polymerase (Thermo Scientific), with ca. 40 ng of genomic DNA of HAMBI  
264 1141 used as template. The obtained PCR products were purified and cloned into a pJET1.2/blunt  
265 vector using the Clone JET Cloning kit (Fermentas) according to the manufacturer's instructions.  
266 The inserted products were verified by sequencing using primers provided in the kit. The verified  
267 upstream and downstream PCR products were both digested with FastDigest BamHI and FastDigest  
268 NotI (Fermentas) restriction endonucleases. The digests were purified and confirmed by agarose gel  
269 electrophoresis. Plasmids pAL01\_MCS1 and pAL02/2\_MCS2 carrying the *lox71* and *lox66* site  
270 respectively, were digested with BamHI and NotI restriction enzymes in sequential reactions,  
271 dephosphorylated and purified. The prepared upstream and downstream PCR inserts (ca. 20 ng)  
272 were ligated into digested vector pAL01\_MCS1 and pAL02/2\_MCS2 (ca. 20 ng) respectively,  
273 resulting in two new vectors named pZZlox71 and pZZlox66. The ligations were precipitated and

274 dissolved in 5  $\mu$ L of water. The constructed pZZlox71 and pZZlox66 plasmids were transformed  
275 into electrocompetent *E. coli* ST18 cells by electroporation (electroporation at 2.5 kV, 25  $\mu$ F and  
276 250  $\Omega$ ). The transformed cells were incubated at 37  $^{\circ}$ C for 1 h and plated on selective media.  
277 Transformants were verified by plasmid profile analysis of BamHI and NotI single and double  
278 digestions of isolated plasmids. To integrate plasmids pZZlox66 and pZZlox71 into the chromid of  
279 HAMBI 1141, verified *E. coli* ST18 clones containing pZZlox66 or pZZlox71 as donors were  
280 mated with HAMBI 1141 as the recipient sequentially. First, 400  $\mu$ L of washed *E. coli*  
281 ST18(pZZlox66) donor strain culture (OD<sub>600</sub> 0.35) was mixed with 1 mL of the recipient strain  
282 HAMBI 1141 (OD<sub>600</sub> 1.2). The pelleted cells were suspended in 50  $\mu$ L of sterile water, spotted on a  
283 TY+ALA plate and incubated at 28  $^{\circ}$ C overnight. The cells were collected from the mating spot and  
284 resuspended in 1 mL of water. Following dilution, the cells were spread onto selective plates  
285 (TY+Gm) and incubated for 3 days. The integration of pZZlox66 into the chromid was verified by  
286 PCR with primers AL064 and ZZ10 (Table S4). After pZZlox66 integration had been confirmed by  
287 PCR, the HAMBI 1141 single plasmid insertion mutant and the *E. coli* ST18(pZZlox71) donor  
288 were grown to stationary phase and mixed at a 1:5 ratio of donor to recipient. The mixed cells were  
289 treated as described above and transconjugants were selected on TY+Nm+Gm plates containing  
290 GusA substrate. A blue colony that arose on a selective plate after three days was picked and its  
291 genomic DNA was isolated, followed by PCR amplification of a 1.7-kb fragment consisting of  
292 genetic regions from both pZZlox71 and the chromid (primers ZZ09 and AL062, Table S4). With  
293 the same genomic template, PCR verification of the first integration was performed again to ensure  
294 that both plasmids have integrated into the chromid of the same strain. The PCR products were then  
295 sequenced with primer pairs AL064 and ZZ10 for the first integration and ZZ09 with a universal  
296 primer RP-48 for the second integration (Table S4). The verified HAMBI 1141 co-integrate strain  
297 was then mated with *E. coli* ST18 carrying pCM157(*pnirS*) at a ratio of 5:2. Transconjugants  
298 appearing on selective plates were tested for excision of the targeted region by verifying loss of

299 their Nm and Gm resistance. Precise excision was validated by PCR amplification of a 1.3 kb  
300 fragment spanning part of both the upstream and downstream regions with primer pair ZZ11 and  
301 ZZ12. The resulting PCR product was sequenced using primer ZZ13 (Table S4). Finally, the  
302 deletion mutant strain was cultivated on plain TY plates to eliminate pCM157(*pnirS*).

303 HAMBI 1207 was cured of its symbiosis plasmid in order to study the ability of this strain  
304 to regain its symbiosis functions through conjugation with corresponding wild-type and mutant  
305 strains. Transposon Tn5-B12S carried on pMH1701 was used to randomly label the replicons of  
306 HAMBI 1207 through mating between an *E. coli* strain that harbours pMH1701 and HAMBI 1207.  
307 Log-phase donor and recipient were mixed at a ratio of 1:5. HAMBI 1207 transposon insertion  
308 mutants were selected on TY+Nm+Sm plates and colonies were picked at random after three days  
309 of incubation. After purification, triparental matings were carried out between the donor strain  
310 HAMBI 1207 insertion mutants, the plasmid free recipient strain *Agrobacterium fabrum* UBAPF2  
311 and a helper strain *E. coli* J-53(RP4-4) at a ratio of 2:2:1. *Agrobacterium* transconjugants were  
312 identified by selection on TY+Nm+Rf plates. After colony purification, *Agrobacterium*  
313 transconjugants were run on a modified Eckhardt gel (described above) to detect the presence of  
314 plasmids. HAMBI 1207 insertion mutants which were identified as carrying the transposon insert  
315 on the symbiosis plasmid were plated on TY plates containing 5 % sucrose, after appropriate  
316 dilutions. These mutants were first incubated at 37 °C for two days and then at 28 °C for a further  
317 three days. Colonies found on sucrose-containing plates accompanied by the loss of neomycin  
318 resistance were picked and subjected to a modified Eckhardt gel electrophoresis (described above)  
319 to further confirm the change of their plasmid pattern.

320 Biparental matings of the plasmid-cured HAMBI 1207 (HAMBI 3489) and the HAMBI  
321 1141 strain where the T4SS gene region on the chromid was deleted (HAMBI 3490) were  
322 performed by mixing 1 mL each of stationary-phase bacterial cultures and preparation of a mating  
323 spot as described above. A corresponding mating was done between wild-type HAMBI 1141 donor

324 and HAMBI 3489 recipient strain. Cells that had been diluted  $10^{-4}$  were flushed from the surface of  
325 the selective plates with TY broth. The suspensions were diluted to an  $OD_{600}$  of about 1.8 prior to  
326 inoculation on *G. officinalis* plants in a jar set-up as described above. Three seeds in a jar were  
327 inoculated with 1 mL of mated bacterial cells. *G. officinalis* seedlings were also inoculated with 50  
328  $\mu$ L of bacterial cells and grown in glass tubes, 3 tubes per mating type. Sterile water was used to  
329 inoculate negative control plants. Inoculated plants in both jars and test tubes were maintained in a  
330 growth chamber as described above. Examination of nodulation was carried out 2 weeks post  
331 inoculation for plants grown in glass tubes and 4 weeks post inoculation for those grown in jars, by  
332 visually inspecting the roots of plants.

333           Gentamicin resistance was introduced to HAMBI 3489 by introducing pZZlox66 into the  
334 chromid (biparental mating of cultures with an  $OD_{600}$  about 0.9, mixed at a ratio 1:1). Colonies that  
335 appeared on selective plates were purified and tested on def8 and LB+ALA media. Clones were  
336 verified by PCR verification from genomic DNA. This strain, HAMBI 3491, was used for  
337 biparental matings with HAMBI 1141, HAMBI 3470 and HAMBI 3490 as the donors. Biparental  
338 spot matings of stationary-phase cultures were performed mixed 1:1 as described above. Biparental  
339 mating of HAMBI 3490 and HAMBI 1587 was also done in the corresponding way. Cells from a  
340  $10^{-5}$  dilution plate as well as an "undiluted" plate of each mating (as described for the mating of  
341 HAMBI 1207 and HAMBI 1587 above) were used to inoculate *G. officinalis* plants (*G. orientalis* for  
342 the HAMBI 3490-HAMBI 1587 exconjugants). The  $OD_{600}$  values for the suspensions used were  
343 1.4-1.7. These suspensions were washed once with water before final resuspension in 1 mL  $H_2O$ .  
344 Strains HAMBI 3491, HAMBI 3490, HAMBI 1141 and the HAMBI 1141 pZZlox71-pZZlox66 co-  
345 integrate strain were used as control inoculants. Again 20  $\mu$ L of each sample was used to inoculate  
346 plants grown in tubes. Where nodules were formed, nodules were isolated, sterilised and crushed in  
347 50  $\mu$ L  $H_2O$ . From this suspension, 20  $\mu$ L was transferred onto a TY or YEM plate and 20  $\mu$ L onto a  
348 TY+Gm plate to select for HAMBI 3491. Colonies that appeared were purified and cultured in HP

349 broth for plasmid gel analysis as described above (modified Eckhardt gel), with HAMBI 3491 and  
350 HAMB 3470 used as reference strains. From the HP broth, 100 f!L was also used to inoculate TY  
351 broths to use for re-inoculation of plants.

352 Table S1. Strains and plasmids used in this study

| strain or plasmid       | characteristics                                                                                                                                          | reference/source                     |
|-------------------------|----------------------------------------------------------------------------------------------------------------------------------------------------------|--------------------------------------|
| <b>strains</b>          |                                                                                                                                                          |                                      |
| <i>N. galegae</i>       |                                                                                                                                                          |                                      |
| HAMBI 540 <sup>T</sup>  | sv. orientalis. Type strain of <i>N. galegae</i>                                                                                                         | [7, 10]                              |
| HAMBI 1174              | Sm <sup>r</sup> , Spc <sup>r</sup> derivative of HAMBI 540 <sup>T</sup>                                                                                  | [11]                                 |
| HAMBI 1141              | sv. officinalis                                                                                                                                          | [7, 10]                              |
| HAMBI 1207              | Sm <sup>r</sup> derivative of HAMBI 1141                                                                                                                 | K. Lindström                         |
| HAMBI 3275              | HAMBI 1174 Δ <i>noeT</i> ::Ω-Km mutant. Sm <sup>r</sup> , Spc <sup>r</sup> , Nm <sup>r</sup>                                                             | This work                            |
| HAMBI 1587              | HAMBI 1174::Tn5 in nodABC. Sm <sup>r</sup> , Spc <sup>r</sup> , Nm <sup>r</sup>                                                                          | [12]                                 |
| HAMBI 3489              | HAMBI 1207 cured of symbiosis plasmid. Sm <sup>r</sup>                                                                                                   | This work                            |
| HAMBI 3470              | HAMBI 1587 containing symbiosis plasmid of HAMBI 1207. Nm <sup>r</sup>                                                                                   | This work                            |
| HAMBI 3490              | HAMBI 1141 chromid T4SS deletion mutant                                                                                                                  | This work                            |
| HAMBI 3491              | HAMBI 3489 containing pZZlox66. Gm <sup>r</sup>                                                                                                          | This work                            |
| <i>R. tropici</i>       |                                                                                                                                                          |                                      |
| HAMBI 1163              | Type strain of <i>R. tropici</i> . CIAT 899                                                                                                              | [13]                                 |
| <i>R. leguminosarum</i> |                                                                                                                                                          |                                      |
| HAMBI 1594              | RBL5515 pRL1J <i>nodA</i> 10::Tn5. Rif <sup>r</sup> , Nod <sup>-</sup>                                                                                   | [14]                                 |
| <i>A. fabrum</i>        |                                                                                                                                                          |                                      |
| HAMBI 1218              | C58 cured of Ti plasmid                                                                                                                                  | [15]                                 |
| UBAPF2                  | Plasmid-free, Rf <sup>r</sup>                                                                                                                            | [16]                                 |
| <i>S. meliloti</i>      |                                                                                                                                                          |                                      |
| HAMBI 1213              | <i>S. meliloti</i> 1021::Tn5 in <i>nodC</i> . Str <sup>r</sup> , Nod <sup>-</sup>                                                                        | [17]                                 |
| <i>E. coli</i>          |                                                                                                                                                          |                                      |
| S17-1 λpir              | Tp <sup>r</sup> , Sm <sup>r</sup> , <i>recA</i> , <i>pro</i> , <i>thi</i> , <i>hsdR</i> <sup>-</sup> M <sup>+</sup> , RP4-2-Tc::Mu-Km::Tn7, λpir lysogen | [18]<br>Provided by Clive Ronson lab |
| ST18                    | S17 λ-pir Δ <i>hemA</i> . ALA                                                                                                                            | [19]                                 |
| <b>plasmids</b>         |                                                                                                                                                          |                                      |
| pJQ200SK                | Suicide vector, P15A <i>oriV sacB mob</i> , Gm <sup>r</sup>                                                                                              | [20]<br>Provided by Clive Ronson lab |
| pHP45Ω-Km               | Source of Ω-Km interposon, Km <sup>r</sup>                                                                                                               | [6]<br>Provided by Clive Ronson lab  |
| pRg103                  | pJQ200SK containing the Ω-Km interposon flanked by upstream and downstream regions of the HAMBI 1174 <i>noeT</i> gene.                                   | This work                            |
| RP4-4                   | helper plasmid. Nm <sup>s</sup> , Ap <sup>r</sup> , Tc <sup>r</sup>                                                                                      | [21]                                 |
| pMH1701                 | Suicide vector, carries Tn5-B12S. Km <sup>r</sup>                                                                                                        | [22]                                 |
| pCM157( <i>pnirS</i> )  | <i>cre</i> gene under <i>nirS</i> promoter of <i>M. gryphiswaldense</i>                                                                                  | [23]                                 |
| pAL01_MCS1              | Carries <i>gusA</i> gene and <i>lox 71</i> site, Km <sup>r</sup>                                                                                         | [23]                                 |
| pAL02/2_MCS2            | Carries <i>lox 66</i> site, Gm <sup>r</sup>                                                                                                              | [23]                                 |
| pZZlox66                | pAL02/2_MCS2 carrying HAMBI 1141 chromid T4SS downstream fragment as BamHI-NotI insert                                                                   | This work                            |
| pZZlox71                | pAL01_MCS1 carrying HAMBI 1141                                                                                                                           | This work                            |



---

chromid T4SS upstream fragment as  
BamHI-NotI insert

---

353 Sm: streptomycin; Spc: spectinomycin; Tp: trimethoprim; Nm: neomycin; Km: kanamycin; Gm: gentamicin; Rf:  
354 rifampicin, Ap: ampicillin.

355 **Table S2. Accession numbers of reference genomes used**

| <b>Strain</b>                                       | <b>BioProject</b> | <b>RefSeq</b>                                            |
|-----------------------------------------------------|-------------------|----------------------------------------------------------|
| <i>R. leguminosarum</i> sv. <i>viciae</i> 3841      | PRJNA57955        | NC_008378-NC_008384                                      |
| <i>S. meliloti</i> 1021                             | PRJNA57603        | NC_003037, NC_003047, NC_003078                          |
| <i>A. fabrum</i> C58                                | PRJNA57865        | NC_003062-NC_003065                                      |
| <i>R. tropici</i> CIAT 899                          | PRJNA185179       | NC_020059-NC_020062                                      |
| <i>S. medicae</i> WSM419                            | PRJNA58549        | NC_009636, NC_009620-NC_009622                           |
| <i>R. leguminosarum</i> sv. <i>trifolii</i> WSM2304 | PRJNA58997        | NC_011366, NC_011368-NC_011371                           |
| <i>R. phaseoli</i> CIAT 652                         | PRJNA59115        | NC_010994, NC_010996-NC_010998                           |
| <i>R. etli</i> sv. <i>mimosae</i> str. Mim1         | PRJNA213896       | NC_021905-NC_021911                                      |
| <i>R. etli</i> CFN 42                               | PRJNA58377        | NC_007761-NC_007766, NC_004041.2                         |
| <i>S. fredii</i> NGR234                             | PRJNA59081        | NC_012587, NC_012586, NC_000914.2                        |
| <i>M. ciceri</i> sv. <i>biserrulae</i> WSM1271      | PRJNA62101        | NC_014923, NC_014918                                     |
| <i>R. rhizogenes</i> K84                            | PRJNA58269        | NC_011983, NC_011985, NC_011987,<br>NC_011990, NC_011994 |

---

356

357 Table S3. Accession numbers of RepABC sequences used

| Strain                                              | replicon     | operon              | accession numbers                      |
|-----------------------------------------------------|--------------|---------------------|----------------------------------------|
| <i>R. leguminosarum</i> sv. <i>viciae</i> 3841      | pRL7         | RepABC              | YP_770746-YP_770748                    |
|                                                     | pRL8         | RepABC              | YP_770902-YP_770904                    |
|                                                     | pRL9         | RepABC              | YP_765299-YP_765301                    |
|                                                     | pRL10        | RepABC              | YP_770304-YP_770306                    |
|                                                     | pRL11        | RepABC              | YP_771034-YP_771036                    |
|                                                     | pRL12        | RepABC              | YP_764518-YP_764520                    |
| <i>R. leguminosarum</i> sv. <i>trifolii</i> WSM2304 | pRLG201      | RepABC              | ACI58641-ACI58643                      |
|                                                     | pRLG202      | RepABC              | YP_002278285-YP_002278287              |
|                                                     | pRLG203      | RepABC              | YP_002283933-YP_002283935              |
|                                                     | pRLG204      | RepABC              | YP_002284251-YP_002284253              |
| <i>R. tropici</i> CIAT 899                          | pRtrCIAT899a | RepABC              | YP_007335859-YP_007335861              |
|                                                     | pRtrCIAT899b | RepABC              | YP_007336359-YP_007336361              |
|                                                     | pRtrCIAT899c | RepABC              | AGB75718-AGB75720                      |
| <i>R. phaseoli</i> CIAT 652                         | pA           | RepABC              | YP_001985988-YP_001985990              |
|                                                     | pB           | RepABC              | YP_001984631-YP_001984633              |
|                                                     | pC           | RepABC1<br>RepABC2  | ACE94483-ACE94485<br>ACE95057-ACE95059 |
| <i>R. etli</i> sv. <i>mimosae</i> str. Mim1         | pRetMIM1a    | RepABC              | YP_008367050-YP_008367052              |
|                                                     | pRetMIM1b    | RepABC              | YP_008367283-YP_008367285              |
|                                                     | pRetMIM1c    | RepABC              | YP_008368599-YP_008368601              |
|                                                     | pRetMIM1d    | RepABC              | YP_008367757-YP_008367759              |
|                                                     | pRetMIM1e    | RepABC              | YP_008368337-YP_008368339              |
|                                                     | pRetMIM1f    | RepABC1<br>RepABC2  | AGS26678-AGS26680<br>AGS26377-AGS26379 |
| <i>R. etli</i> CFN 42                               | p42a         | RepABC1             | YP_471769-YP_471771                    |
|                                                     |              | RepABC2             | YP_471629-YP_471631                    |
|                                                     | p42b         | RepABC              | YP_471932-YP_471934                    |
|                                                     | p42c         | RepABC              | YP_472164-YP_472166                    |
|                                                     | p42d         | RepABC              | NP_660040-NP_660042                    |
|                                                     | p42e         | RepABC              | YP_472619-YP_472621                    |
|                                                     | p42f         | RepABC1             | YP_473186-YP_473188                    |
| RepABC2                                             |              | YP_472830-YP_472832 |                                        |
| <i>S. fredii</i> NGR234                             | pNGR234a     | RepABC              | NP_443801-NP_443803                    |
|                                                     | pNGR234b     | RepABC              | ACP21477-ACP21479                      |
| <i>S. meliloti</i> 1021                             | pSymA        | RepABC              | AAK65950-AAK65952                      |
|                                                     | pSymB        | RepABC              | CAC48447-CAC48449                      |
| <i>S. medicae</i> WSM419                            | pSMED01      | RepABC              | ABR62896-ABR62898                      |
|                                                     | pSMED02      | RepABC              | ABR63950-ABR63952                      |
|                                                     | pSMED03      | RepABC              | YP_001314978-YP_001314980              |
| <i>M. ciceri</i> sv. <i>biserrulae</i> WSM1271      | pMESCI01     | RepABC              | YP_004134557-YP_004134559              |
| <i>R. rhizogenes</i> K84                            | pAtK84b      | RepABC              | YP_002551334-YP_002551336              |
|                                                     | pAtK84c      | RepABC              | YP_002546569-YP_002546571              |
| <i>A. fabrum</i> C58                                | pC58Ti       | RepABC              | NP_396560-NP_396562                    |

358 **Table S4. Primers used in this study**

| primer          | sequence 5'-3'                     | reference |
|-----------------|------------------------------------|-----------|
| HsnTLRBamHI     | AAATTTGGATCCGCGGCATAGAAGACCTGATG   |           |
| HsnTLLSpeI-418  | TTTAAACTAGTCCTCCTTGCAGTCATAGATC    |           |
| HsnTRLBamHI     | AAATTTGGATCCGCTCGTTAGAGCATTTCGA    |           |
| HsnTRRXhoI-4553 | TTTAAACTCGAGCTCCAGTCAATTCCGGACAG   |           |
| hsnTL-655       | CTGTTCAATTTGCACTTAGAGC             |           |
| hsnTR-488       | ATAACTCTCAGCCACAATCG               |           |
| hsnTmutLL       | GCATTATCTGGTCGTGTATG               |           |
| hsnTmutLR       | ACTATCAGGTCAAGTCTGCT               |           |
| hsnTmutRL       | TTGATGTTACCCGAGAGCTT               |           |
| hsnTmutRR       | ACGACATGCTGTCATAGAAG               |           |
| hsnTcomF        | AAATTTAAGCTTCATTTGCACTTAGAGCTCAA   |           |
| hsnTcomR        | TTTAAAAAGCTTTTGAAACAGAGTCTATCTCG   |           |
| ZZ01            | TTTAAAGGATCCGGTTCTCGGTCAGGTTGGAG   |           |
| ZZ08            | AAATTTGCGGCCGCACCGGATTCGAGGTTGCTC  |           |
| ZZ03            | TTTAAAGGATCCGATGATGGCAAGTTCGGCAC   |           |
| ZZ04            | AAATTTGCGGCCGCCAATCACCAATGCGCTCCTG |           |
| AL064           | CAGATTACGGTGACGATCCC               | [23]      |
| ZZ10            | CGTGGAGATTTTCGGCCTATG              |           |
| ZZ09            | CAGCCATCGCGTAACGTTG                |           |
| AL062           | CGCAACGCAATTAATGTGAG               | [23]      |
| RP-48           | AGCGGATAACAATTCACACAGGA            |           |
| ZZ11            | CGATCGGTGTAGAAGGTCTG               |           |
| ZZ12            | AGTGAGAAGTCCAGCTTCAG               |           |
| ZZ13            | CCGAAGCACGTGACATCCTG               |           |

359

360 **References**

- 361 1. Staden R, Beal KF, Bonfield JK: **The Staden package, 1998.** In *Methods in Molecular Biology.*  
362 Volume 132. Edited by Misener S, Krawets SA. Totowa, New Jersey: Humana Press; 2000:115-  
363 130.
- 364 2. Tamura K, Peterson D, Peterson N, Stecher G, Nei M, Kumar S: **MEGA5: Molecular**  
365 **Evolutionary Genetics Analysis using Maximum Likelihood, Evolutionary Distance, and**  
366 **Maximum Parsimony Methods.** *Mol Biol Evol* 2011, **28**:2731-2739.
- 367 3. Jones DT, Taylor WR, Thornton JM: **The rapid generation of mutation data matrices from**  
368 **protein sequences.** *Comput Appl Biosci* 1992, **8**:275-282.
- 369 4. Yang Z: **PAML 4: Phylogenetic Analysis by Maximum Likelihood.** *Mol Biol Evol* 2007,  
370 **24**:1586-1591.
- 371 5. Guindon S, Dufayard J, Lefort V, Anisimova M, Hordijk W, Gascuel O: **New algorithms and**  
372 **methods to estimate maximum-likelihood phylogenies: assessing the performance of PhyML**  
373 **3.0.** *Syst Biol* 2010, **59**:307-321.
- 374 6. Fellay R, Frey J, Krisch H: **Interposon mutagenesis of soil and water bacteria: a family of**  
375 **DNA fragments designed for in vitro insertional mutagenesis of Gram-negative bacteria.** *Gene*  
376 1987, **52**:147-154.
- 377 7. Lindström K, Lehtomäki S: **Metabolic properties, maximum growth temperature and phage**  
378 **sensitivity of *Rhizobium* sp. (*Galega*) compared with other fast-growing rhizobia.** *FEMS*  
379 *Microbiol Lett* 1988, **50**:277-287.
- 380 8. Vincent JM: *A manual for the study of root-nodule bacteria (IBP Handbook No. 15).* Oxford:  
381 Blackwell Scientific Publications; 1970.
- 382 9. Eckhardt T: **A rapid method for the identification of plasmid deoxyribonucleic acid in**  
383 **bacteria.** *Plasmid* 1978, **1**:584-588.
- 384 10. Radeva G, Jurgens G, Niemi M, Nick G, Suominen L, Lindström K: **Description of two**  
385 **biovars in the *Rhizobium galegae* species: biovar orientalis and biovar officinalis.** *Syst Appl*  
386 *Microbiol* 2001, **24**:192-205.
- 387 11. Lindström K, Sarsa M, Polkunen J, Kansanen P: **Symbiotic nitrogen fixation of *Rhizobium***  
388 **(*Galega*) in acid soils, and its survival in soil under acid and cold stress.** *Plant Soil* 1985,  
389 **87**:293-302.
- 390 12. Suominen L, Roos C, Lortet G, Paulin L, Lindström K: **Identification and structure of the**  
391 ***Rhizobium galegae* common nodulation genes: evidence for horizontal gene transfer.** *Mol Biol*  
392 *Evol* 2001, **18**:907-916.
- 393 13. Martínez-Romero E, Segovia L, Mercante FM, Franco AA, Graham P, Pardo MA: ***Rhizobium***  
394 ***tropici*, a novel species nodulating *Phaseolus vulgaris* L. beans and *Leucaena* sp. trees.** *Int J*  
395 *Syst Bacteriol* 1991, **41**:417-426.

- 396 14. Wijffelman CA, Pees E, van Brussel AAN, Okker RJH, Lugtenberg BJJ: **Genetic and**  
397 **functional analysis of the nodulation region of the *Rhizobium leguminosarum* Sym plasmid**  
398 **pRL1JI.** *Arch Microbiol* 1985, **143**:225-232.
- 399 15. van Larebeke N, Engler G, Holsters M, van den Elsacker S, Zaenen I, Schilperoort RA, Schell J:  
400 **Large plasmid in *Agrobacterium tumefaciens* essential for crown gall-inducing ability.** *Nature*  
401 1974, **252**:169-170.
- 402 16. Hynes MF, Simon R, Pühler A: **The development of plasmid-free strains of *Agrobacterium***  
403 ***tumefaciens* by using incompatibility with a *Rhizobium meliloti* plasmid to eliminate pAtc58.**  
404 *Plasmid* 1985, **13**:99-105.
- 405 17. Meade HM, Long SR, Ruvkun GB, Brown SE, Ausubel FM: **Physical and genetic**  
406 **characterization of symbiotic and auxotrophic mutants of *Rhizobium meliloti* induced by**  
407 **transposon Tn5 mutagenesis.** *J Bacteriol* 1982, **149**:114-122.
- 408 18. Simon R, Priefer U, Pühler A: **A broad host range mobilization system for in vivo genetic**  
409 **engineering: transposon mutagenesis in Gram negative bacteria.** *Nat Biotech* 1983, **1**:784-791.
- 410 19. Thoma S, Schobert M: **An improved *Escherichia coli* donor strain for diparental mating.**  
411 *FEMS Microbiol Lett* 2009, **294**:127-132.
- 412 20. Quandt J, Hynes MF: **Versatile suicide vectors which allow direct selection for gene**  
413 **replacement in gram-negative bacteria.** *Gene* 1993, **127**:15-21.
- 414 21. Simon R: **High frequency mobilization of gram-negative bacterial replicons by the in vitro**  
415 **constructed Tn5-Mob transposon.** *Mol Gen Genet* 1984, **196**:413-420.
- 416 22. Hynes MF, Quandt J, O'Connell MP, Pühler A: **Direct selection for curing and deletion of**  
417 ***Rhizobium* plasmids using transposons carrying the *Bacillus subtilis* sacB gene.** *Gene* 1989,  
418 **78**:111-120.
- 419 23. Lohße A, Ullrich S, Katzmann E, Borg S, Wanner G, Richter M, Voigt B, Schweder T, Schüler  
420 **D: Functional analysis of the magnetosome island in *Magnetospirillum gryphiswaldense*: the**  
421 ***mamAB* operon is sufficient for magnetite biomineralization.** *PLoS ONE* 2011, **6**:e25561.
